# Supplementary material
Source: PubMed Central journal article supplement (PMC5835694)
Supplement: ajcr0008-0266-f7.pdf [file ajcr0008-0266-f7.pdf]

## AQP8 inhibits CRC growth and metastasis

**Supplementary Table 1.** qPCR primer sequences of target genes and GAPDH

| Gene       |           | Primer sequence                |
|------------|-----------|--------------------------------|
| AQP8       | Sense     | 5'-GCGAGTGCCTGGTACGAAC-3'      |
| AQP8       | Antisense | 5'-CAGGCACCCGATGAAGATGAA-3'    |
| PCDH7      | Sense     | 5'-GGATCGGGTGAGGTGACTTTC-3'    |
| PCDH7      | Antisense | 5'-GTTCTCGTCGAAGATCATCTGAC-3'  |
| E-cadherin | Sense     | 5'-AAAGGCCCATTTCCCTAAAAACCT-3' |
| E-cadherin | Antisense | 5'-TGCCTTCTCTATCCAGAGGCT-3'    |
| N-cadherin | Sense     | 5'-AGCTCCATTCGACTTAGACA-3'     |
| N-cadherin | Antisense | 5'-CAGCCTGAGCACGAAGAGTG-3'     |
| RFX6       | Sense     | 5'-AAGCAGCGGATCAATACCTGT-3'    |
| RFX6       | Antisense | 5'-ACCGTGGTAAGCAAACCTCTT-3'    |
| SLC4A4     | Sense     | 5'-TGATCGGGAGGCTTCTTCTCT-3'    |
| SLC4A4     | Antisense | 5'-GGACCGAAGTTGGATTCTTG-3'     |
| SEMA6D     | Sense     | 5'-GCTTTGTGCCTACATACTGCT-3'    |
| SEMA6D     | Antisense | 5'-ACCGGATATTGCCTTGAATAGTG-3'  |
| ATXN10     | Sense     | 5'-GGAACCTGGATACGATTGGTGT-3'   |
| ATXN10     | Antisense | 5'-GCACCCAAACAATAGACTGGGAA-3'  |
| CLDN8      | Sense     | 5'-CACCCATGCCTTAGAAATCGC-3'    |
| CLDN8      | Antisense | 5'-TCACGCAATTCATCCACAGTC-3'    |
| TRPM6      | Sense     | 5'-AGCACAATCATACCAGCTCA-3'     |
| TRPM6      | Antisense | 5'-CATGGTCTCCAATCAGTCGGC-3'    |
| MARK1      | Sense     | 5'-GAGCGGGACACGAAAATCAT-3'     |
| MARK1      | Antisense | 5'-TGCTACTCGACTTGGTAGGCT-3'    |
| RNF152     | Sense     | 5'-CTGTCATCGCCATTCCACACA-3'    |
| RNF152     | Antisense | 5'-GCAGCATGTAGCACCCATTG-3'     |
| SCN9A      | Sense     | 5'-CCTCAGAGCTTTGTCCATTCA-3'    |
| SCN9A      | Antisense | 5'-TTGTCTGCATAGTAGGGGTCC-3'    |
| GAPDH      | Sense     | 5'-ACAACCTTGGTATCGTGAAGG-3'    |
| GAPDH      | Antisense | 5'-GCCATCACGCCACAGTTTC-3'      |

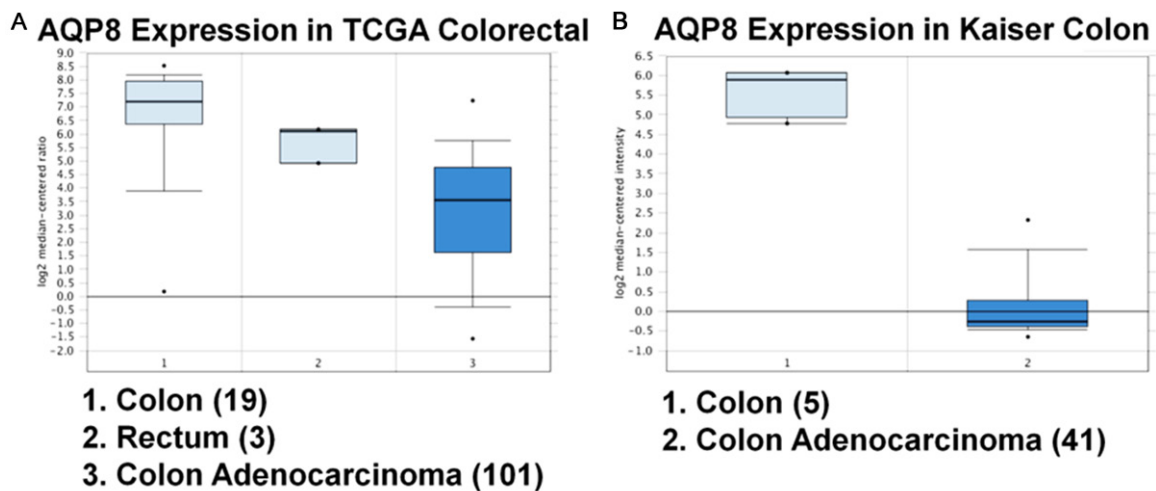

**Supplementary Figure 1.** Box plots derived from gene expression data in Oncomine comparing expression of AQP8 in normal and CRC tissue.

AQP8 inhibits CRC growth and metastasis

**Genes Co-expressed with AQP8 in Sabates-Bellver Colon**

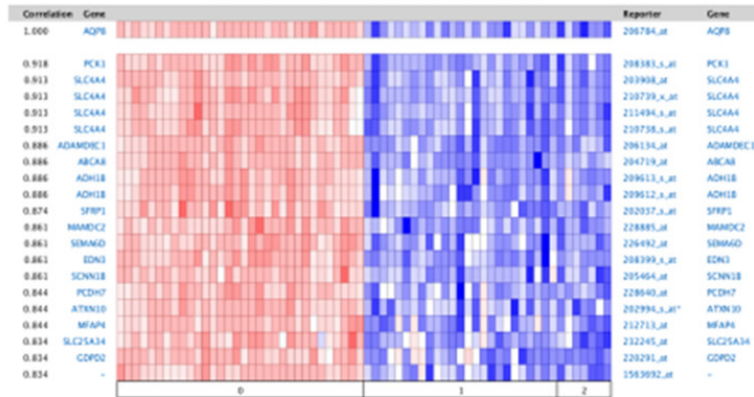

- 0. No value (32)
- 1. Colon Adenoma (25)
- 2. Rectal Adenoma (7)

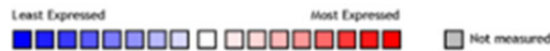

**Genes Coexpressed with AQP8 in Skrzypczak Colorectal**

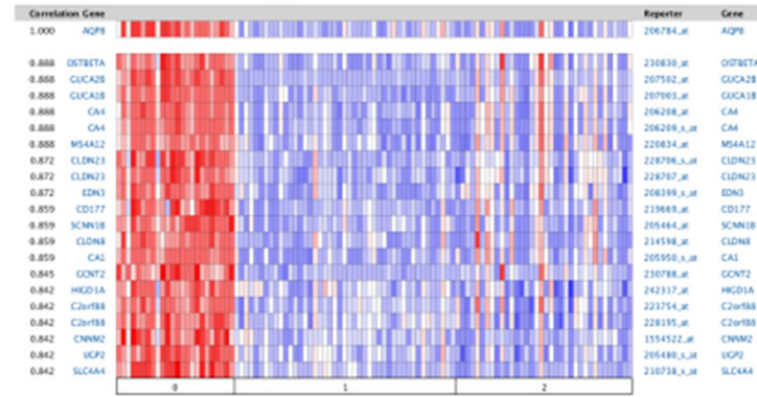

- 0. No value (24)
- 1. Colorectal Adenocarcinoma (45)
- 2. Colorectal Carcinoma (36)

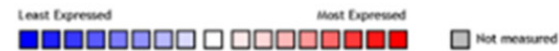

**Genes Co-expressed with AQP8 in Hong Colorectal**

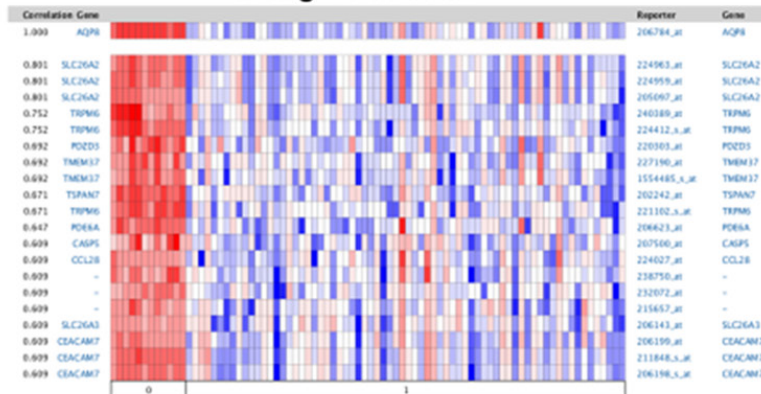

- 0. No value (12)
- 1. Colorectal Carcinoma (70)

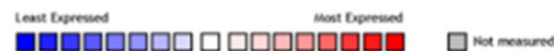

Supplementary Figure 2. Co-expression data from Oncomine ([www.oncomine.org](http://www.oncomine.org)). We used the following filters: gene 'AQP8' Analysis Type: 'Co-expression analysis' Cancer Type: 'CRC'. The color changed according to a weaker (blue) or higher (red) expression.
